# Supplementary material for: Electrochemistry-controlled metal ion release from silicone elastomer nanocomposites through combination of different metal nanoparticles
Source: Royal Society of Chemistry journal article supplement (doi:10.1039/c0jm04480f), 2011-01-01
Supplement: c0jm04480f.pdf [file c0jm04480f.pdf]

## Supporting information

### Electrochemistry-controlled metal ion release from silicone elastomer nanocomposites through combination of different metal nanoparticles

A. Hahn, S. Günther, P. Wagener, S. Barcikowski

Silver, copper and gold ion concentration was analysed by using a graphite platform atomic absorption spectrometer (nova 400, Analytik Jena). Eluates were analysed according to the thermal programs described in Table 1.

Settings were as follows:

#### **Copper ion measurement:**

Wavelength at 324.8 nm, 3.0 mA lamp current, 0.8 nm slit, and 20  $\mu\text{l}$  sample volume. Calibration concentration was 10  $\mu\text{g/l}$ .

#### **Silver ion measurement:**

Wavelength at 328.1 nm, 4.0 mA lamp current, 0.8 nm slit, and 20  $\mu\text{l}$  sample volume. A modifier of 0.5% Palladium was used. Calibration concentration was 10  $\mu\text{g/l}$ .

#### **Gold ion measurement:**

Wavelength at 242.8 nm, 5.0 mA lamp current, 0.8 nm slit, and 20  $\mu\text{l}$  sample volume. Calibration concentration was 10  $\mu\text{g/l}$ .

Table 1. Thermal programmes used for AAS

|         | Silver             | Gold               | Copper             |
|---------|--------------------|--------------------|--------------------|
| Stages: | $^{\circ}\text{C}$ | $^{\circ}\text{C}$ | $^{\circ}\text{C}$ |
| Dry     | 90-350             | 90-350             | 90-250             |
| Ash     | 850                | 850                | 900                |
| Atom    | 1600               | 1850               | 1950               |
| Clean   | 2300               | 2300               | 2300               |

All measurements were done in triplicate.
